# Supplementary material for: The myokine FGF21 associates with enhanced survival in ALS and mitigates stress-induced cytotoxicity
Source: PubMed Central journal article supplement — bioRxiv. 2024 Sep 14:2024.09.11.611693. Preprint. [Version 1] doi: 10.1101/2024.09.11.611693 (PMC11419072; doi:10.1101/2024.09.11.611693), 2024-09-14
Supplement: media-1.pdf [file media-1.pdf]

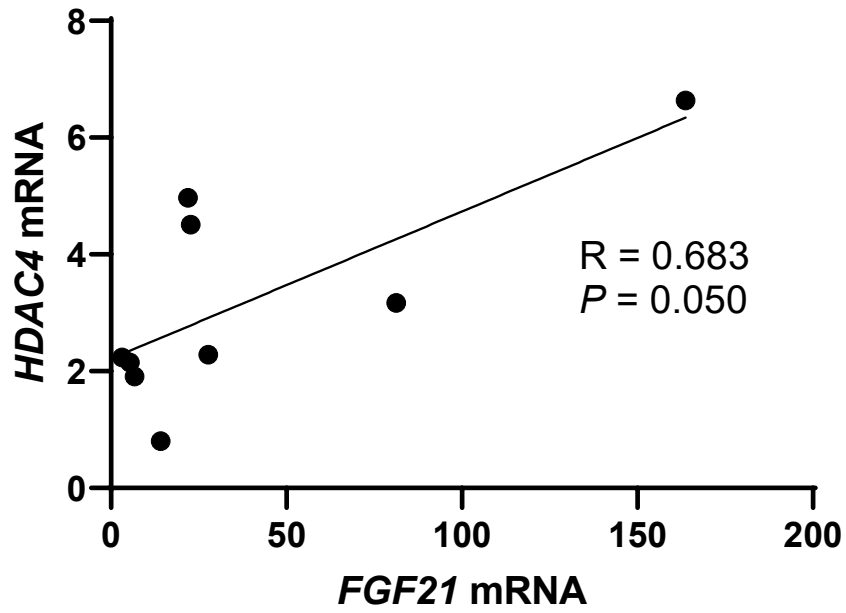

**Supplementary Figure 1.** Spearman rank test correlation between *HDAC4* and *FGF21* mRNA expression levels (assessed by qPCR) in 9 post-mortem ALS muscle samples.

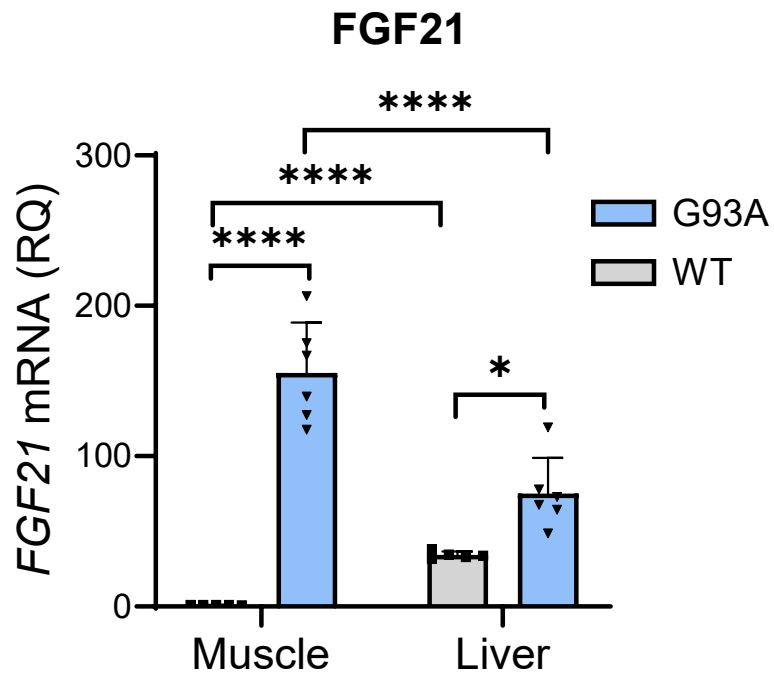

**Supplementary Figure 2. FGF21 mRNA is increased in muscle and liver tissue in the SOD1<sup>G93A</sup> mouse.** RNA was extracted from wild-type (WT) and SOD1<sup>G93A</sup> mouse tissue at post-natal day 60 and assessed by qPCR for FGF21 mRNA. All values represent fold-change compared to WT muscle which was set at 1. Data points represent individual mice and bars represent the mean  $\pm$  SD. \* $P < 0.05$ , \*\*\*\* $P < 0.0001$ ; one-way ANOVA followed by Tukey's multiple comparisons test.

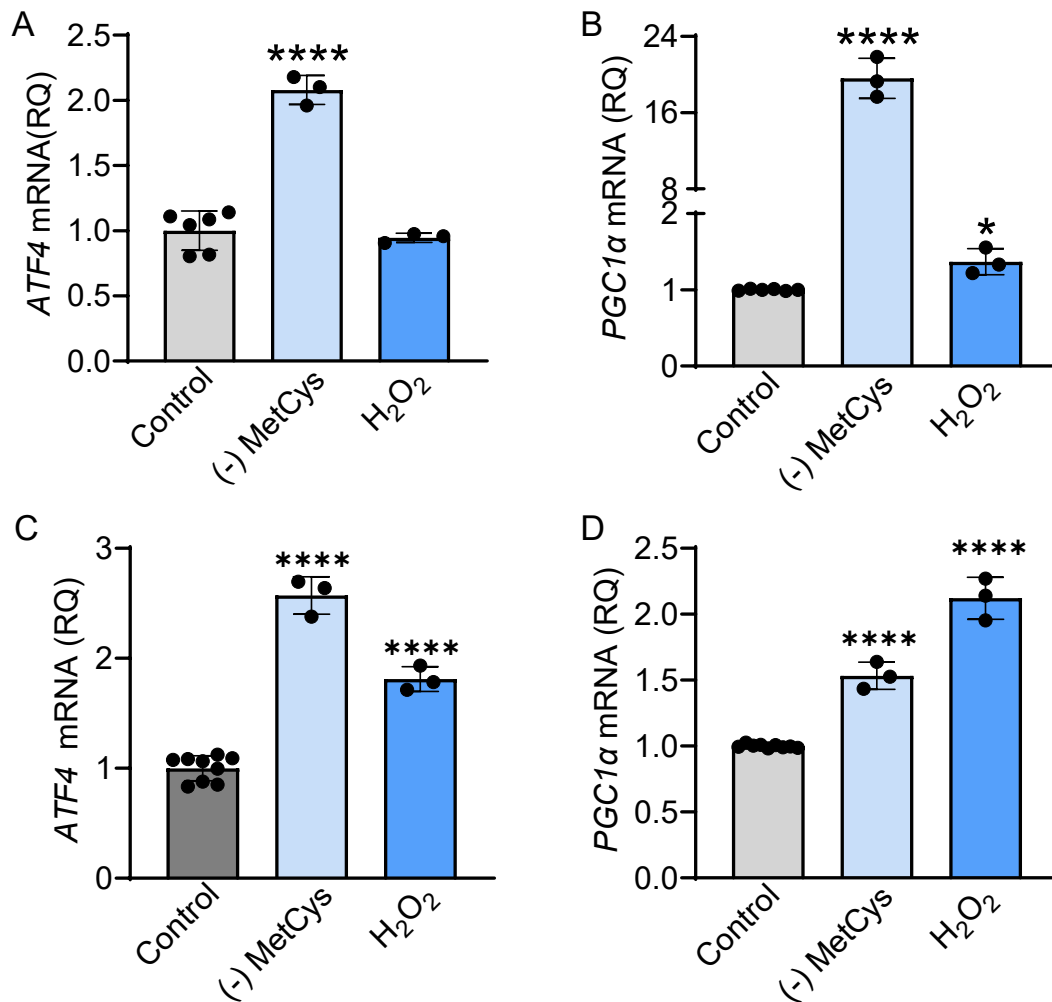

**Supplementary Figure 3. Oxidative stressors induce *ATF4* and *PGC-1α* in NSC-34 motor neuron-like cells and C2C12 myoblasts.** (A) and (B) *ATF4* and *PGC-1α* mRNA levels in NSC-34 cells were quantified after treatment with 100  $\mu$ M H<sub>2</sub>O<sub>2</sub> or methionine-cysteine (MetCys)-depleted media for 24 h. (C) and (D) *ATF4* and *PGC-1α* mRNA levels were quantified in C2C12 myoblasts after exposure to the same conditions as in (A) and (B). Data points are independent biological samples and bars represent the mean  $\pm$  SD. \* $P = 0.048$ , \*\*\*\* $P < 0.0001$ ; one-way ANOVA followed by Tukey's multiple comparisons test.

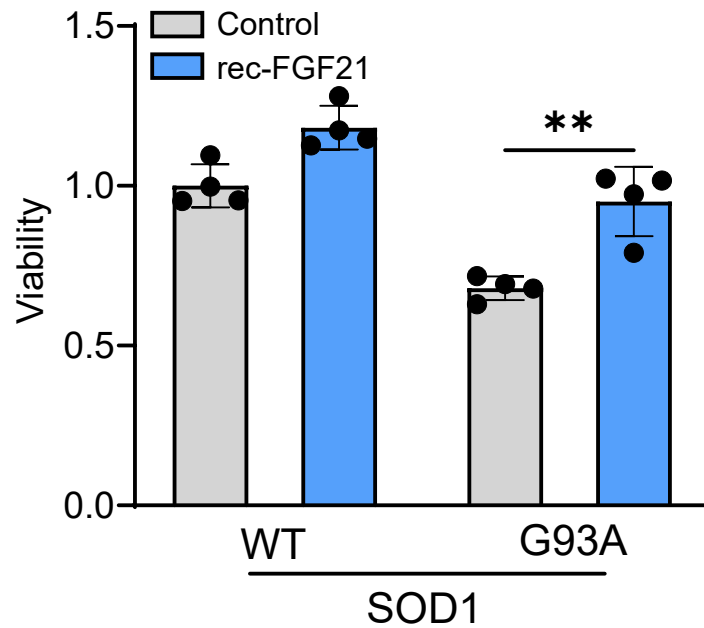

**Supplementary Figure 4. Recombinant FGF21 treatment reverses cytotoxicity of NSC-34 motor neuron-like cells expressing SOD1<sup>G93A</sup>.** NSC-34 cells expressing either WT SOD1 or SOD1<sup>G93A</sup> were treated with recombinant FGF21 (100 ng/ml). Cell viability was measured 24 hours later as described in the methods. Bars represent the mean  $\pm$  SD of 4 independent biological samples. \*\*P = 0.003; unpaired two-tailed t-test.

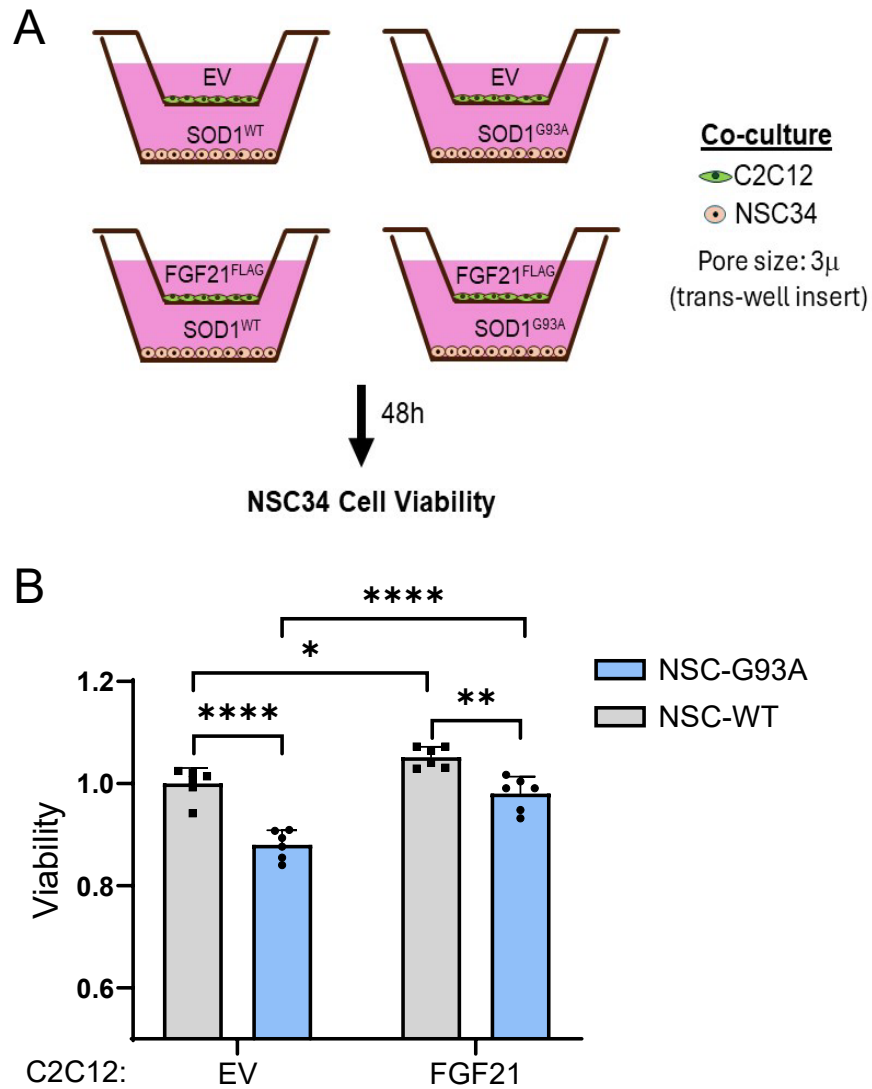

**Supplementary Figure 5. C2C12 cells expressing FGF21 rescue SOD1<sup>G93A</sup>-mediated toxicity in NSC-34 motor neuron like cells in co-culture.** (A) Schematic of co-culture system used. (B) Cell viability of NSC-34 cells expressing either WT-SOD1 or SOD1<sup>G93A</sup> (lower well) was assessed in the presence or absence of FGF21-expressing C2C12 cells (upper well). Data points represent biological replicates and bars are the mean  $\pm$  SD. \* $P = 0.025$ , \*\* $P = 0.002$ , \*\*\*\* $P < 0.0001$ ; one-way ANOVA followed by Tukey's multiple comparisons test.

**Supplementary Table 1: Demographic and clinical data for iPSC-derived motor neurons.**

| <b>Cell Line</b>             | <b>Sex</b> | <b>Age (y)</b> | <b>Clinical Diagnosis</b> | <b>Primary tissue</b> | <b>Mutation</b>     |
|------------------------------|------------|----------------|---------------------------|-----------------------|---------------------|
| <b>CS0002iCTR</b>            | M          | 51             | Normal                    | PBMC                  | N/A                 |
| <b>CS83iCTR</b>              | F          | 21             | Normal                    | Fibroblast            | N/A                 |
| <b>CS188iCTR</b>             | M          | 80             | Normal                    | PBMC                  | N/A                 |
| <b>CS14iCTR</b>              | F          | 35             | Normal                    | Fibroblast            | N/A                 |
| <b>CS00iCTR</b>              | M          | 6              | Normal                    | Fibroblast            | N/A                 |
| <b>FA0000011</b>             | F          | 49             | Normal                    | Fibroblast            | N/A                 |
| <b>NN0003920</b>             | M          | 64             | Normal                    | Fibroblast            | N/A                 |
| <b>CS0118iALS-SOD1-I114T</b> | F          | 73             | ALS                       | Fibroblast            | SOD1 I113T          |
| <b>CS28iALS</b>              | M          | 47             | ALS                       | Fibroblast            | C9ORF72 (HRE ~800)  |
| <b>CS29iALS</b>              | M          | 47             | ALS                       | Fibroblast            | C9ORF72 (HRE ~800)  |
| <b>CS52iALS</b>              | M          | 49             | ALS                       | Fibroblast            | C9ORF72 (HRE ~800)  |
| <b>CS30iALS</b>              | F          | 51             | ALS                       | Fibroblast            | C9ORF72 (HRE ~70)   |
| <b>NN0004306</b>             | F          | 51             | ALS                       | Fibroblast F10330     | C9ORF72 (HRE 2.7kb) |
| <b>NN0004307</b>             | M          | 57             | ALS                       | Fibroblast F09152     | C9ORF72 (HRE 6-8kb) |

ALS = amyotrophic lateral sclerosis; F = female; HRE = hexanucleotide repeat expansion; M = male; ORF = open reading frame; PBMC = peripheral blood mononuclear cells; SOD1 = superoxide dismutase 1; y = years

**Supplementary Table 2. Demographic and clinical data of tissue samples.**

|                                      | <b>Biopsy</b> |                                        | <b>Autopsy</b> |                                        |
|--------------------------------------|---------------|----------------------------------------|----------------|----------------------------------------|
|                                      | <b>Normal</b> | <b>ALS</b>                             | <b>Normal</b>  | <b>ALS</b>                             |
| <b>Number</b>                        | 24            | 36                                     | 22             | 23                                     |
| <b>Mean age (years) <sup>a</sup></b> | 52 ± 15       | 57 ± 13                                | 67 ± 12        | 64 ± 11                                |
| <b>Age range (years)</b>             | 24 - 77       | 27- 86                                 | 34 - 83        | 40 - 81                                |
| <b>Gender (M:F)</b>                  | 11:13         | 21:15                                  | 18:4           | 18:5                                   |
| <b>Duration <sup>b</sup> (m)</b>     |               | 15 ± 9                                 |                | 51 ± 32                                |
| <b>Diagnosis</b>                     |               | Spinal onset (33 )<br>Bulbar onset (3) |                | Spinal onset (20 )<br>Bulbar onset (3) |
| <b>Muscle sampled</b>                |               |                                        |                |                                        |
| <b>Biceps brachii</b>                | 5             | 2                                      |                | 2                                      |
| <b>Deltoid</b>                       | 3             | 11                                     | 4              | 3                                      |
| <b>Vastus lateralis</b>              | 15            | 8                                      | 3              | 5                                      |
| <b>Tibialis anterior</b>             | 1             | 15                                     |                | Triceps (1)                            |

<sup>a</sup> Mean age (± SD) at time of sample collection.

<sup>b</sup> Mean duration (± SD) from onset of symptoms to sample collection. Duration was unknown for three ALS patients in the biopsy pool.

**Supplementary Table 3: Demographic and clinical data of plasma samples**

|                           | Normal  | ALS                                   |
|---------------------------|---------|---------------------------------------|
| Number                    | 23      | 28                                    |
| Mean age (y) <sup>a</sup> | 61 ± 9  | 59 ± 10                               |
| Age range (y)             | 45 - 84 | 35- 82                                |
| Gender (M:F)              | 12:11   | 18:10                                 |
| Duration <sup>b</sup> (m) |         | 26 ± 20                               |
| Onset                     |         | Spinal onset (22)<br>Bulbar onset (6) |

F = female; M = male; m = months; y = years

<sup>a</sup> Mean age (± SD) at time of sample collection.

<sup>b</sup> Mean duration (± SD) from onset of symptoms to sample collection.



### Supplementary Table 4: ALS study patients

| Plasma FGF21 (FC) <sup>a</sup> | < 1.5                    | ≥ 1.5                |
|--------------------------------|--------------------------|----------------------|
| Number                         | 7                        | 9                    |
| Age (y) <sup>b</sup>           | 65 ± 9                   | 57 ± 9 <sup>d</sup>  |
| Age range (y)                  | 58 - 82                  | 42 - 70 <sup>d</sup> |
| Gender (M:F)                   | 4:3                      | 7:2                  |
| Duration <sup>c</sup> (m)      | 18 ± 10                  | 26 ± 23 <sup>d</sup> |
| Onset                          | Bulbar (4)<br>Spinal (3) | Spinal (9)           |

F = female; FC = fold-change; M = male; m = months; y = years

<sup>a</sup>Fold-change over normal control group

<sup>b</sup>Mean age (± SD) at time of sample collection.

<sup>c</sup>Mean duration (± SD) from onset of symptoms to sample collection.

<sup>d</sup>No significant difference between the 2 groups
